# Supplementary material
Source: ML conference proceedings conference paper supplement (https://openaccess.thecvf.com/content/ACCV2022/html/Chen_Reading_Arbitrary-Shaped_Scene_ACCV_2022_paper.html)
Supplement: Supplementary file 1 [file Chen_Reading_Arbitrary-Shaped_Scene_ACCV_2022_supplemental.pdf]

# Reading Arbitrary-Shaped Scene Text from Images Through Spline Regression and Rectification

## — Supplementary Material

Long Chen, Feng Su, Jiahao Shi, and Ye Qian

Nanjing University

### 1 Network Configuration

Tables 1, 2, and 3 show the configuration of the text feature rectification module, the text recognition network, and the text region regression network, respectively. In the text region regression network, the ResNet [2] and FPN [3] backbones adopt the configurations in original literatures. The Cascade R-CNN [1] module comprises three stages, using IoU thresholds  $\{0.5, 0.55, 0.6\}$  and loss weights  $\{1, 0.5, 0.25\}$  in each stage respectively. As all the stages of the Cascade R-CNN have the same network configuration, only the configuration of one stage is shown. Code is available at: <https://github.com/ChenLLong/SPRNet>.

**Table 1.** Configuration of the text feature rectification module. The output is the predicted parameters for feature deformation. 'maps', 'k', and 's' denote the number of filters, kernel size, and stride.

| Layer             | Configuration                               | Output Size               |
|-------------------|---------------------------------------------|---------------------------|
| Input             | -                                           | $16 \times 16 \times 256$ |
| Conv Layer        | maps:256, k: $1 \times 1$ , s: $1 \times 1$ | $16 \times 16 \times 256$ |
| Conv Layer        | maps:256, k: $3 \times 3$ , s: $1 \times 1$ | $16 \times 16 \times 256$ |
| Conv Layer        | maps:256, k: $3 \times 3$ , s: $1 \times 1$ | $16 \times 16 \times 256$ |
| Max Pool          | maps:256, k: $2 \times 2$ , s: $2 \times 2$ | $8 \times 8 \times 256$   |
| Conv Layer        | maps:512, k: $3 \times 3$ , s: $1 \times 1$ | $8 \times 8 \times 512$   |
| Max Pool          | maps:512, k: $2 \times 2$ , s: $2 \times 2$ | $4 \times 4 \times 512$   |
| Reshape & Concat. | -                                           | 8192                      |
| FC                | hidden units: 256                           | 256                       |
| FC                | hidden units: 14                            | 14                        |

### 2 Limitation

Figure 1 shows some examples of the failure cases of the proposed text spotting method. Most of the detection errors were caused by low/uneven illumination,

**Table 2.** Configuration of the text recognition network. 'maps', 'k', and 's' denote the number of filters, kernel size, and stride.

| Layer                 | Configuration              | Output Size              |
|-----------------------|----------------------------|--------------------------|
| Input                 | -                          | $256 \times 8 \times 32$ |
| Conv Layer $\times 2$ | $maps : 256, k : 3, s : 1$ | $256 \times 8 \times 32$ |
| Max Pool              | $k : (2, 1), s : (2, 1)$   | $256 \times 4 \times 32$ |
| Conv Layer $\times 2$ | $maps : 256, k : 3, s : 1$ | $256 \times 4 \times 32$ |
| Max Pool              | $k : (2, 1), s : (2, 1)$   | $256 \times 2 \times 32$ |
| Conv Layer $\times 2$ | $maps : 256, k : 3, s : 1$ | $256 \times 2 \times 32$ |
| Avg Pool              | $k : (2, 1), s : (2, 1)$   | $256 \times 1 \times 32$ |
| BiLSTM                | hidden units: 256          | $256 \times 1 \times 32$ |
| Att. GRU              | hidden units: 256          | -                        |

blurring, interfering object, or ambiguous orientation of text. On the other hand, as a light-weight text recognition module is employed in the text spotting network, it failed to recognize text in some challenging cases such as obscure text with stuck-together characters and upside-down ambiguous character sequences in some ring-shaped or mirrored text. To improve the performance of the proposed text spotting network in these challenging cases, an enhanced detection backbone and data augmentation measures can be employed, and some effective language models can be introduced to improve the accuracy of the text recognition network.

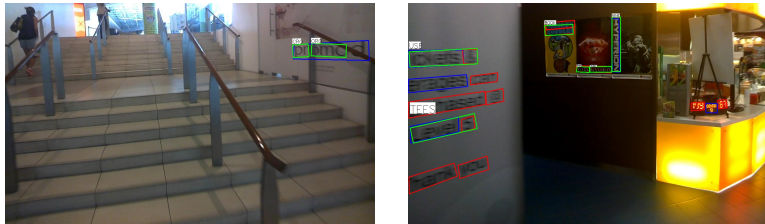

(a) Detection errors

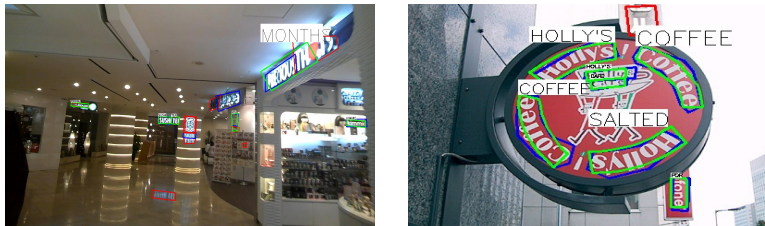

(b) Recognition errors

**Fig. 1.** Examples of failure cases of the proposed text spotting method. Green boxes indicate detected text instances with corresponding recognition results shown nearby. Blue boxes indicate ground-truth text instances. Red boxes indicate text instances that are not considered by the performance evaluation protocol.

**Table 3.** Configuration of the text region regression network. FC denotes fully connected layer. 'maps', 'k', and 's' denote the number of filters, kernel size, and stride respectively.  $w$  and  $h$  denote the width and height of the input image.

| Module                 |                          | Layer             | Configuration                                  | Output Size                                   |
|------------------------|--------------------------|-------------------|------------------------------------------------|-----------------------------------------------|
| ResNet & FPN           | Same to [2] and [3]      |                   |                                                |                                               |
| RPN                    | level 2                  | Input             | -                                              | $\frac{w}{4} \times \frac{h}{4} \times 256$   |
|                        |                          | Conv (class)      | maps:3, k:1 × 1, s:1 × 1                       | $\frac{w}{4} \times \frac{h}{4} \times 3$     |
|                        |                          | Conv (box)        | maps:12, k:1 × 1, s:1 × 1                      | $\frac{w}{4} \times \frac{h}{4} \times 12$    |
|                        | level 3                  | Input             | -                                              | $\frac{w}{8} \times \frac{h}{8} \times 256$   |
|                        |                          | Conv (class)      | maps:3, k:1 × 1, s:1 × 1                       | $\frac{w}{8} \times \frac{h}{8} \times 3$     |
|                        |                          | Conv (box)        | maps:12, k:1 × 1, s:1 × 1                      | $\frac{w}{8} \times \frac{h}{8} \times 12$    |
|                        | level 4                  | Input             | -                                              | $\frac{w}{16} \times \frac{h}{16} \times 256$ |
|                        |                          | Conv (class)      | maps:3, k:1 × 1, s:1 × 1                       | $\frac{w}{16} \times \frac{h}{16} \times 3$   |
|                        |                          | Conv (box)        | maps:12, k:1 × 1, s:1 × 1                      | $\frac{w}{16} \times \frac{h}{16} \times 12$  |
|                        | level 5                  | Input             | -                                              | $\frac{w}{32} \times \frac{h}{32} \times 256$ |
|                        |                          | Conv (class)      | maps:3, k:1 × 1, s:1 × 1                       | $\frac{w}{32} \times \frac{h}{32} \times 3$   |
|                        |                          | Conv (box)        | maps:12, k:1 × 1, s:1 × 1                      | $\frac{w}{32} \times \frac{h}{32} \times 12$  |
| RoIAlign               |                          |                   |                                                | $7 \times 7 \times 256$                       |
| Cascade R-CNN          |                          | AvgPool           | maps:256, k:7 × 7, s:1 × 1                     | $1 \times 1 \times 256$                       |
|                        |                          | Reshape           | -                                              | 256                                           |
|                        |                          | FC                | hidden units: 1024                             | 1024                                          |
|                        |                          | FC                | hidden units: 1024                             | 1024                                          |
|                        | class branch             | FC                | hidden units: 2                                | 2                                             |
|                        | box branch               | FC                | hidden units: 8                                | 8                                             |
| RoIAlign               |                          |                   |                                                | $16 \times 16 \times 256$                     |
| Text Region Regression | text direction branch    | MaxPool           | maps:256, k:16 × 16, s:1 × 1                   | $1 \times 1 \times 256$                       |
|                        |                          | Reshape           | -                                              | 256                                           |
|                        |                          | FC                | hidden units: 2                                | 2                                             |
|                        | shape parameter branches | Conv              | maps:256, k:1 × 1, s:1 × 1                     | $16 \times 16 \times 256$                     |
|                        |                          | Conv              | maps:256, k:3 × 3, s:1 × 1                     | $16 \times 16 \times 256$                     |
|                        |                          | Conv              | maps:256, k:3 × 3, s:1 × 1                     | $16 \times 16 \times 256$                     |
|                        |                          | MaxPool           | maps:256, k:2 × 2, s:2 × 2                     | $8 \times 8 \times 256$                       |
|                        |                          | Conv              | maps:512, k:3 × 3, s:1 × 1                     | $8 \times 8 \times 512$                       |
|                        |                          | MaxPool           | maps:512, k:2 × 2, s:2 × 2                     | $4 \times 4 \times 512$                       |
|                        |                          | Reshape & Concat. | -                                              | 8192                                          |
|                        |                          | FC                | hidden units: 512 (centerline), 512 (boundary) | 512, 512                                      |
|                        |                          | FC                | hidden units: 27 (centerline), 72 (boundary)   | 27, 72                                        |

### 3 Scene Text Spotting Results

The following are some examples of scene text spotting results of the proposed method. Text instances detected are marked with green boxes with the recognized text shown nearby. The results demonstrate the proposed method's capability to robustly localize and recognize scene text with various curved shapes, orientations, sizes, and tight spacing with other text instances.

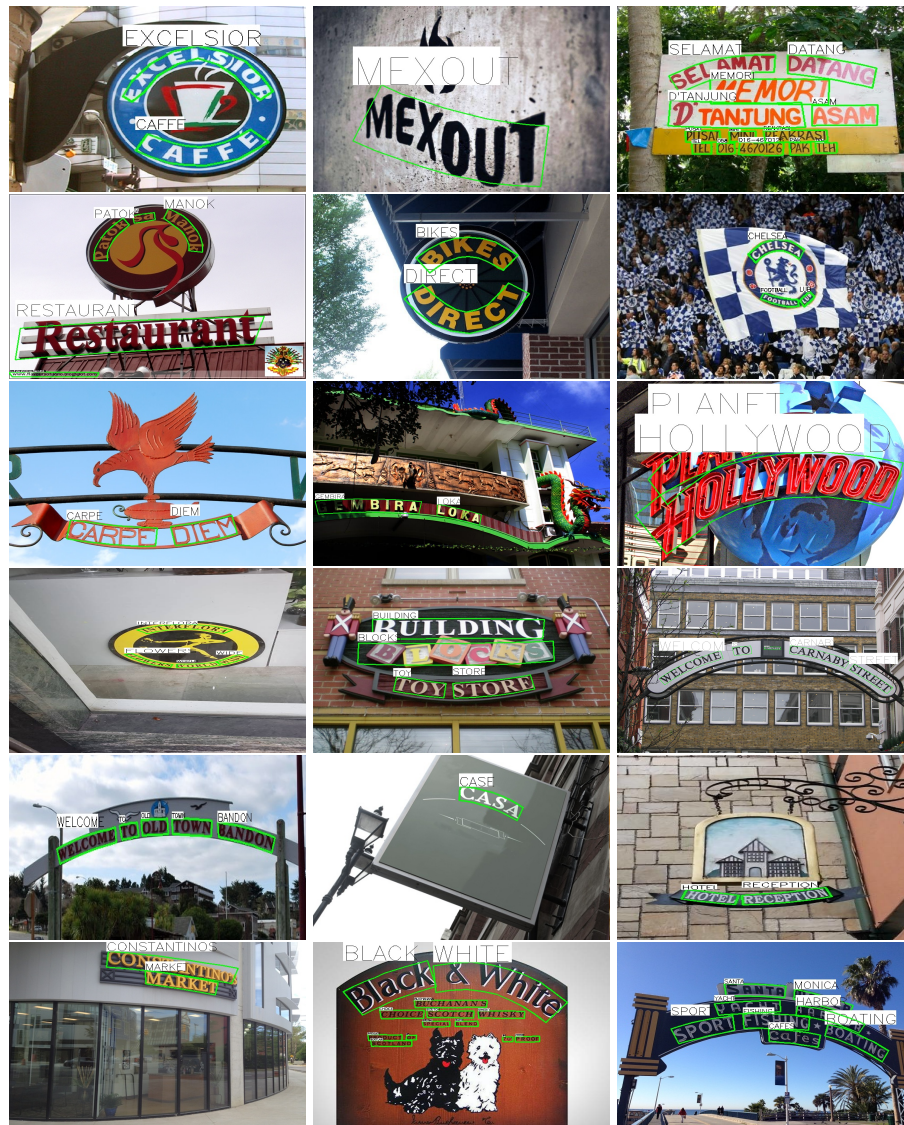



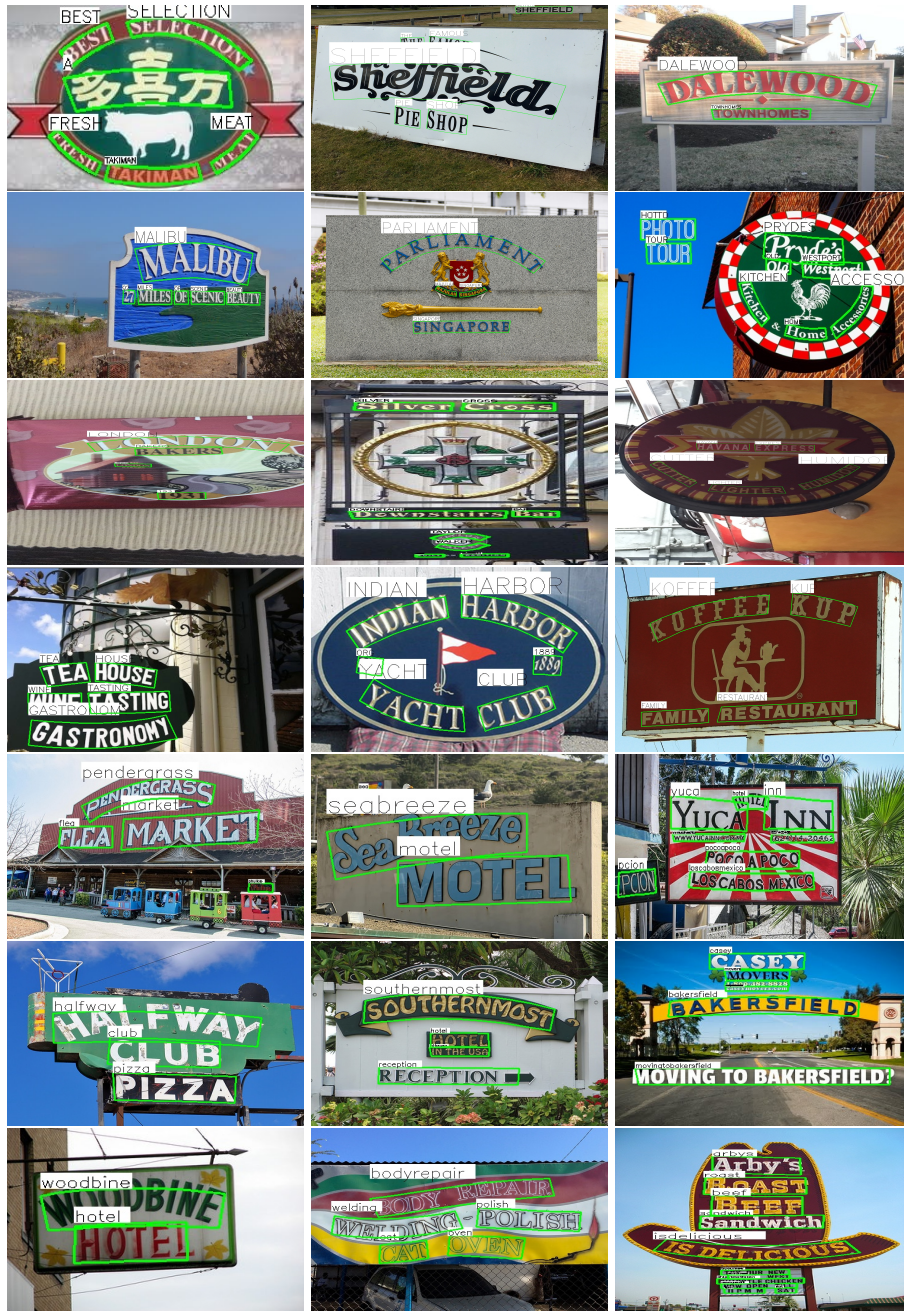

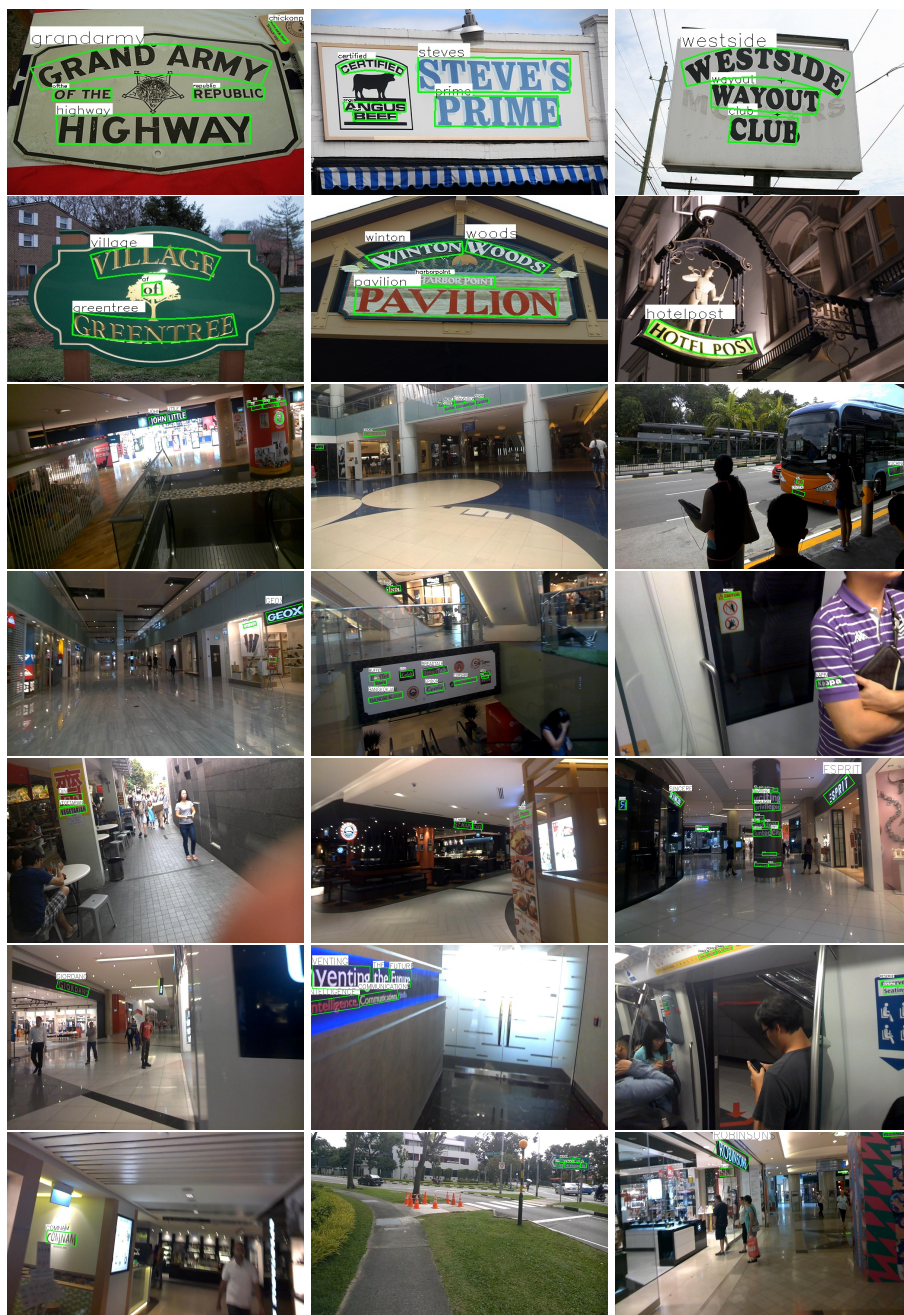



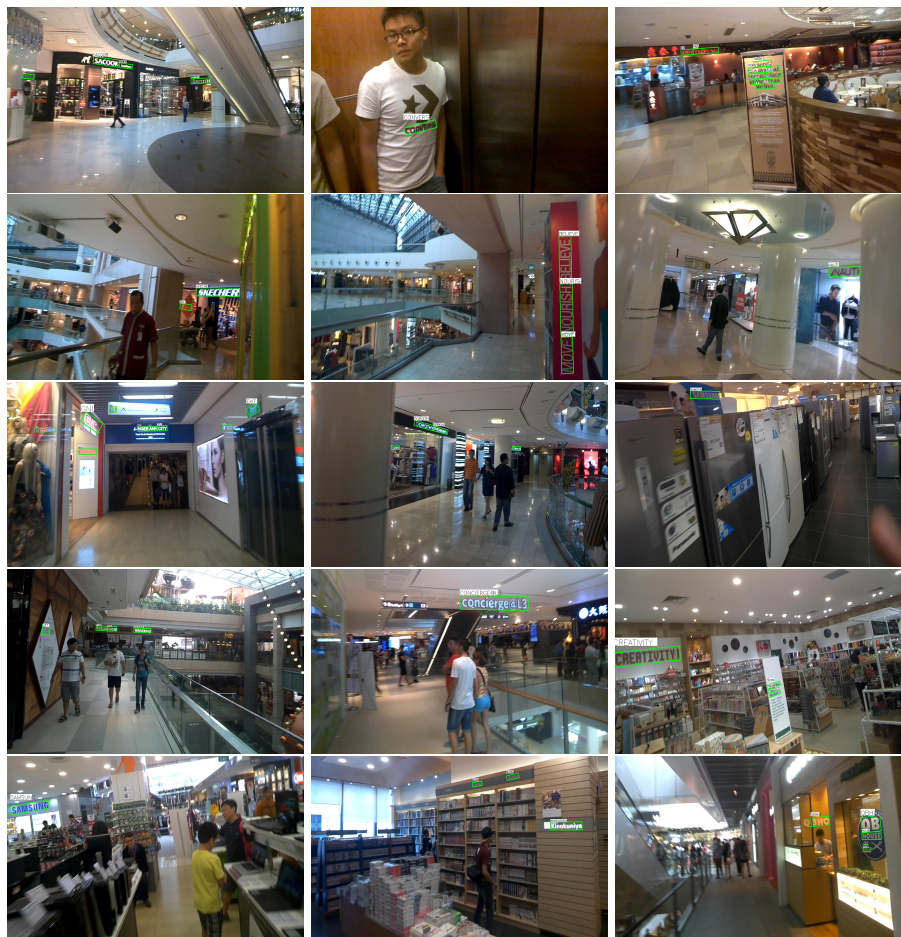

## References

1. Cai, Z., Vasconcelos, N.: Cascade R-CNN: Delving into high quality object detection. In: CVPR. pp. 6154–6162 (2018)
2. He, K., Zhang, X., Ren, S., Sun, J.: Deep residual learning for image recognition. In: CVPR. pp. 770–778 (2016)
3. Lin, T., Dollár, P., Girshick, R.B., He, K., Hariharan, B., Belongie, S.J.: Feature pyramid networks for object detection. In: CVPR. pp. 936–944 (2017)
